# Supplementary material
Source: HighWire-hosted journal article supplement (doi:10.1101/rna.035410.112)
Supplement: SuppTab1.pdf [file SuppTab1.pdf]

**Supplementary Table 1.** Protein factors that bind IL7R pre-mRNA\*.

| <b>Protein factors that bound an RNA spanning exon 6 and adjacent intronic sequences</b> |
|------------------------------------------------------------------------------------------|
| DHX9, ATP-dependent RNA helicase A                                                       |
| <i>ILF3, interleukin enhancer-binding factor 3</i>                                       |
| <i>ILF2, interleukin enhancer-binding factor 2</i>                                       |
| <i>hnRNP U, heterogeneous nuclear ribonucleoprotein U</i>                                |
| PTBP1, polypyrimidine tract-binding protein 1                                            |
| <i>hnRNP R, heterogeneous nuclear ribonucleoprotein R</i>                                |
| <i>hnRNP A/B, heterogeneous nuclear ribonucleoprotein A/B</i>                            |
| <i>hnRNP A3, heterogeneous nuclear ribonucleoprotein A3</i>                              |
| <i>TOP1, DNA topoisomerase 1</i>                                                         |
| <i>hnRNP D-like, heterogeneous nuclear ribonucleoprotein D-like</i>                      |
| U2AF2, splicing factor U2AF 65 kDa subunit                                               |
| EIF2AK2, interferon-induced, double stranded RNA-activated protein kinase                |
| <i>hnRNPUL2, heterogeneous nuclear ribonucleoprotein U-like protein 2</i>                |
| CPSF1, cleavage and polyadenylation specificity factor subunit 1                         |
| DDX3X, ATP-dependent RNA helicase DDX3X                                                  |
| hnRNP L, heterogeneous nuclear ribonucleoprotein L                                       |
| DDX5, probable ATP-dependent RNA helicase DDX5                                           |
| DDX21, nucleolar RNA helicase 2                                                          |
| hnRNP H3, heterogeneous nuclear ribonucleoprotein H3                                     |
| RL22, 60S ribosomal protein L22                                                          |
| U2AF1, splicing factor U2AF 35 kDa subunit                                               |
| <i>hnRNP A0, heterogeneous nuclear ribonucleoprotein A0</i>                              |
| <i>La, lupus La protein</i>                                                              |
| RSL1D1, ribosomal L1 domain-containing protein 1                                         |
| FIP1, pre-mRNA 3' end processing factor FIP1                                             |
| TOE1, target of EGR1 protein 1                                                           |
| SF3A1, splicing factor 3A subunit 1                                                      |
| ELAVL1, ELAV-like protein 1                                                              |
| <i>PURB, transcriptional activator protein Pur-beta</i>                                  |
| DHX36, probable ATP-dependent RNA helicase DHX36                                         |
| hnRNPUL1, heterogeneous nuclear ribonucleoprotein U-like protein 1                       |
| <i>NEP1, probable ribosome biogenesis protein</i>                                        |
| SRSF9, Serine/Arginine-rich splicing factor 9                                            |
| <i>SF1, splicing factor 1</i>                                                            |
| SF3B1, splicing factor 3B subunit 1                                                      |
| <i>hnRNP G, heterogeneous nuclear ribonucleoprotein G</i>                                |
| G3BP1, Ras GTPase-activating protein-binding protein 1                                   |
| QKI, Quaking                                                                             |
|                                                                                          |
| <b>Protein factors that bound an RNA spanning the first 40 nt of exon 6</b>              |
| NCL, nucleolin                                                                           |

|                                                                     |
|---------------------------------------------------------------------|
| hnRNP D0, heterogeneous nuclear ribonucleoprotein D0                |
| hnRNP Q, heterogeneous nuclear ribonucleoprotein Q                  |
| YBX1, Nuclease-sensitive element-binding protein 1                  |
| <i>hnRNP A/B, heterogeneous nuclear ribonucleoprotein A/B</i>       |
| snRNP70, U1 snRNP 70 kDa                                            |
| NONO, non-POU domain-containing octamer-binding protein             |
| <i>hnRNP A3, heterogeneous nuclear ribonucleoprotein A3</i>         |
| H1.2, Histone H1.2                                                  |
| PABP2, polyadenylate-binding protein 2                              |
| SRP14, signal recognition particle 14 kDa protein                   |
| PABP1, polyadenylate-binding protein 1                              |
| <i>ILF3, interleukin enhancer-binding factor 3</i>                  |
| <i>ILF2, interleukin enhancer-binding factor 2</i>                  |
| <i>hnRNP D-like, heterogeneous nuclear ribonucleoprotein D-like</i> |
| <i>La, lupus La protein</i>                                         |
| SmD1, small nuclear ribonucleoprotein Sm D1                         |
| <i>PURB, transcriptional activator protein Pur-beta</i>             |
| Sm D3, small nuclear ribonucleoprotein Sm D3                        |
| Sm D2, small nuclear ribonucleoprotein Sm D2                        |
| FUS, RNA-binding protein FUS                                        |
| snRNP F, small nuclear ribonucleoprotein F                          |
| SRP9, signal recognition particle 9 kDa protein                     |
| RSMB, snRNP-associated proteins B and B' and N                      |
| THOC4, THO complex subunit 4                                        |
| GNB2L1, guanine nucleotide-binding protein subunit beta-2-like 1    |
| H1.4, histone H1.4                                                  |
| <i>NEP1, probable ribosome biogenesis protein</i>                   |
| <i>hnRNP G, heterogeneous nuclear ribonucleoprotein G</i>           |
| <i>TOP1, DNA topoisomerase 1</i>                                    |
| DBPA, DNA-binding protein A                                         |
| snRNP A, U1 small nuclear ribonucleoprotein A                       |
| MAP4, microtubule-associated protein 4                              |
| <i>SF1, splicing factor 1</i>                                       |
| snRNP E, small nuclear ribonucleoprotein E                          |
| RL6, 60S ribosomal protein L6                                       |
| 1433E, 14-3-3 protein epsilon                                       |
| SAFB1, scaffold attachment factor B1                                |
| RL18, 60S ribosomal protein L18                                     |
| RSSA, 40S ribosomal protein SA                                      |
| snRNP G-like, small nuclear ribonucleoprotein G-like                |
| SRSF3, Serine/Arginine-rich splicing factor 3                       |
| PURA, transcriptional activator protein Pur-alpha                   |
| RL31, 60S ribosomal protein L31                                     |
| H2B, histone H2B                                                    |
| DDX39B, spliceosome RNA helicase DDX39B                             |

|                                                                           |
|---------------------------------------------------------------------------|
| RBM3, putative RNA-binding protein 3                                      |
| RS30, 40S ribosomal protein S30                                           |
| CIRBP, cold-inducible RNA-binding protein                                 |
| PABP4, polyadenylate-binding protein 4                                    |
| <i>hnRNP A0, heterogeneous nuclear ribonucleoprotein A0</i>               |
| RL29, 60S ribosomal protein L29                                           |
| <i>hnRNPUL2, heterogeneous nuclear ribonucleoprotein U-like protein 2</i> |
| 1433G, 14-3-3 protein gamma                                               |
| ZN787, zinc finger protein 787                                            |
| RL8, 60S ribosomal protein L8                                             |
| H1X, histone H1x                                                          |
| <i>hnRNP C1/C2, heterogeneous nuclear ribonucleoprotein C1/C2</i>         |
| RL30, 60S ribosomal protein L30                                           |
| PTMA, prothymosin alpha                                                   |
| <i>hnRNP U, heterogeneous nuclear ribonucleoprotein U</i>                 |
| RL15, 60S ribosomal protein L15                                           |
| <i>hnRNP U, heterogeneous nuclear ribonucleoprotein U</i>                 |
| RL7, 60S ribosomal protein L7                                             |
| RS3, 40S ribosomal protein S3                                             |
| RS20, 40S ribosomal protein S20                                           |

\*Protein factors identified by RNA affinity chromatography and mass spectrometry either with RNAs that contain the exon 6 and flanking intronic sequences (top list) or the first 40 nt of exon 6 (bottom list) are shown. The following criteria were used to create this list of protein candidates: at least one unique peptide with probability of identification of 49-95% present in duplicate experimental samples and no unique peptides (or 1-2 unique peptides with low probability of identification (0-49%)) in the "no RNA control". Proteins that bound both RNAs are shown in italics. The lists are ranked based on the number of high-confidence unique peptides identified.
